# Supplementary material for: High activation of STAT5A drives peripheral T-cell lymphoma and leukemia
Source: PubMed Central journal article supplement — Haematologica. 2019 May 23;105(2):435–47. doi: 10.3324/haematol.2019.216986 (PMC7012494; doi:10.3324/haematol.2019.216986), 2020-02
Supplement: 2019_216986-Disclosures_and_Contributions.pdf [file 2019_216986-Disclosures_and_Contributions.pdf]

Haematologica  
HAEMATOL/2019/216986  
Version 4

High activation of STAT5A drives peripheral T-cell lymphoma and leukemia

Barbara Maurer, Harini Nivarthi, Bettina Wingelhofer, Ha Thi Than Pham, Michaela Schleder, Tobias Suske, Reinhard Grausenburger, Ana-Iris Schiefer, Michaela Prchal-Murphy, Doris Chen, Susanne Winkler, Olaf Merkel, Christoph Kornauth, Maximilian Hofbauer, Birgit Hochgatterer, Gregor Hoermann, Andrea Hoelbl-Kovacic, Jana Prochazkova, Cosimo Lobello, Abbarna A. Cumaraswamy, Johanna Latzka, Melitta Kitzwögerer, Andreas Chott, Andrea Janikova, árka Pospíilova, Joanna I. Loizou, Stefan Kubicek, Peter Valent, Thomas Kolbe, Florian Grebien, Lukas Kenner, Patrick T. Gunning, Robert Kralovics, Marco Herling, Mathias Müller, Thomas Rülcke, Veronika Sexl, and Richard Moriggl

Disclosures: none

Contributions: B.M. and H.N. planned and performed most of the experiments, analyzed and interpreted the data and supervised S.W., M.Ho. and B.H. in cloning and basic phenotyping. T.K. and T.R. generated transgenic animal models. M.P.-M. and A.H.-K. did HSC characterization and thymidine incorporation assays. R.G. and D.C. performed RNA-seq analysis. B.W. and B.M. performed inhibitor treatments. G.H. assessed blood smears and H.T.T.P. performed an immunoblot. M.S. supported immunohistochemistry and staining quantification. C.L., A.J., C.K., J.L., M.K., O.M., A.-I.S., L.K., S.P., A.C. and E.G. provided and performed patient material analysis, L.K. and A.-I.S. evaluated mouse histology. A.A.C. and P.T.G. developed and provided AC-3-19. J.P., J.L., S.K., F.G., V.S., P.V., R.K., M.He. and M.M. gave critical input and advice during the project and on the manuscript. R.M. designed, supervised and financed the project. B.M. and R.M. wrote the manuscript.
